# Supplementary material
Source: Springer Nature journal article supplement (https://www.springermedizin.de/resource/supplementary/12992_2013_307_MOESM2_ESM.pdf/9616242)
Supplement: MOESM2 [file 9616242]

Number of ehealth regulations

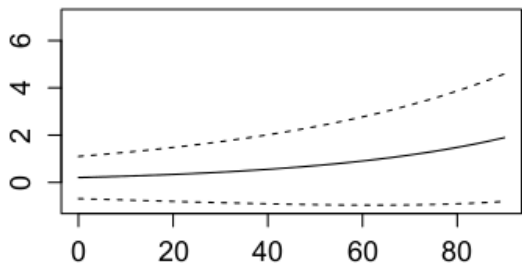

Government expenditures on health (% THE)

Number of ehealth regulations

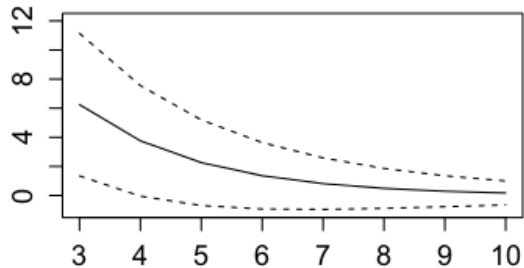

Economic freedom (no regulations)

Number of ehealth regulations

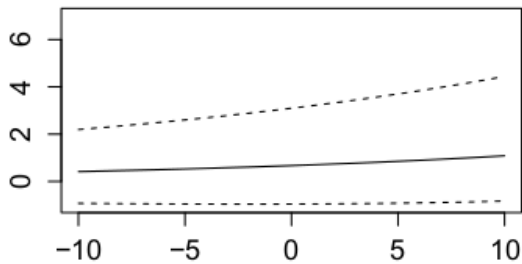

Polity Score

Number of ehealth regulations

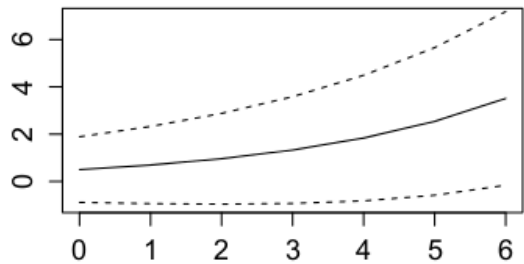

Public-private partnerships
